# Supplementary material
Source: Research Square preprint supplement (doi:10.21203/rs.3.rs-9088264/v1)
Supplement: Supplementary file 1 [file da2df14550987d5983fda5b5.docx]

Table S1.

| Class | Phenotype | Females | Males | Total |
| --- | --- | --- | --- | --- |
| 1 | Cy;D | 32 | 36 | 68 |
| 2 | Cy;Sb | 40 | 31 | 71 |
| 3 | Pm;D | 46 | 39 | 85 |
| 4 | Pm;Sb | 38 | 37 | 75 |

Table S1. Control Cross Results (Discriminant Control Cross 1). Segregation of marker phenotypes in the control cross used to validate expected Mendelian ratios. Total progeny scored: n = 299.

Table S2.

| Phenotype | Observed | Expected | χ² contribution |
| --- | --- | --- | --- |
| Cy;D | 68 | 75 | 0.16 |
| Cy;Sb | 71 | 75 | 0.05 |
| Pm;D | 85 | 75 | 0.33 |
| Pm;Sb | 75 | 75 | 0.00 |

# Table S2. Chi-square Analysis of Control Cross. Chi-square Analysis of Control Cross

Expected segregation ratio: 1:1:1:1. Total χ² = 0.54; degrees of freedom (df) = 3; P > 0.05. Observed segregation does not deviate significantly from the expected ratio.

# Table S3

| Phenotype | Females | Males | Total |
| --- | --- | --- | --- |
| +,+ (wild type) | 209 | 163 | 372 |
| eya | 0 | 0 | 0 |

# Table S3. Wild-Type Discriminant Cross demonstrating only wild-type progeny, indicating that the eya phenotype was absent in the F1 generation.

Table S4.

| Phenotype | Females | Males | Total |
| --- | --- | --- | --- |
| Pm;Sb | 44 | 62 | 106 |
| eya;Sb | 54 | 28 | 82 |
| Pm | 37 | 33 | 70 |
| eya | 18 | 13 | 31 |

# Table S4. Marker Discriminant Cross 2 Results. Segregation of marker phenotypes used for chromosomal linkage analysis. Total progeny scored: n = 289. Results indicate linkage between the mutation and chromosome 2 markers.

# Table S5. Complementation Test Summary

| Genetic Cross | Total Progeny | Interpretation |
| --- | --- | --- |
| eyeless × unknown mutation | 284 | Wild-type progeny observed (mutations complement) |
| eya allele × unknown mutation | 295 | All progeny display eya phenotype (mutations are allelic) |

# Table S5. Complementation Test Summary showing a nearly 50% split between eyeless x unknown mutation and the eya allele x unknown mutation. Wild-type progeny were observed almost exclusively in the eyeless x unknown mutation.

# Table S6.

| Gene Pair | Total Progeny | χ² value | Interpretation |
| --- | --- | --- | --- |
| eya – net | 1041 | 50.59 | Observed recombination differs from expected 17 map units |
| eya – b | 976 | 168.9 | Observed recombination differs from expected 26 map units |

# Table S6. Recombination Mapping Summary. Chi-square values exceed the critical value (χ² = 7.81, df = 3, P = 0.05), indicating significant deviation from expected recombination frequencies.
